# Supplementary material for: The Design of WASPEC: A Fully Personalised Moodle System Using Semantic Web Technologies
Source: MDPI journal article supplement (doi:10.3390/computers10050059), 2021-05-01
Supplement: s1 [file s1]

Archive with 1 entries (1 files):
- computers-1176933-supplementary.pdf
