# Supplementary material for: The Design of WASPEC: A Fully Personalised Moodle System Using Semantic Web Technologies
Source: MDPI journal article supplement (doi:10.3390/computers10050059), 2021-05-01
Supplement: s1 [file s1 › computers-1176933-supplementary.pdf]

# Evaluation of the WASPEC Platform

WASPEC is an E-learning platform (developed by customizing MOODLE) which provides personalized learning experiences for learners based on multiple parameters. The video describes the process of personalization as a course instructor or teacher. Please fill the short questionnaire that follow. Thanks!

For further reference, please read:

[https://www.researchgate.net/publication/338634901\\_A\\_Model\\_of\\_a\\_Weighted\\_Agent\\_System\\_for\\_Personalised\\_E-Learning\\_Curriculum](https://www.researchgate.net/publication/338634901_A_Model_of_a_Weighted_Agent_System_for_Personalised_E-Learning_Curriculum)

Please be informed that your response will be used (anonymously) as part of a research study on personalized learning. Participation in this study is completely voluntary. If you decide not to participate, there will not be any negative consequences. Please be aware that if you decide to participate, you may stop requesting your response to be retrieved. By submitting this questionnaire, you agree that your data can be used in the presentation of results in this study. Thanks

Email address \*

hemoomajeed@gmail.com

## The Design of WASPEC

### The Design of WASPEC

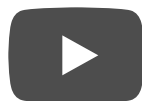

Name

Humam AL-Chalabi

Institutional Affiliation \*

Craiova university

Position \*

☐ Professor/Teacher

☒ PhD Student/Course Instructor

☐ Other: .....

## Comments/Reviews/Recommendations

---

### Perceived Usefulness

Using the WASPEC platform increases productivity in selecting multiple parameters for personalisation with regards to available learning resources. \*

- ☒ Strongly agree
- ☐ Agree
- ☐ Neutral
- ☐ Disagree
- ☐ Strongly Disagree

Using the WASPEC platform to create multi-parameter personalised courses in a curriculum would increase teaching performance. \*

- ☒ Strongly agree
- ☐ Agree
- ☐ Neutral
- ☐ Disagree
- ☐ Strongly Disagree

Using the WASPEC platform would increase effectiveness in creating personalised courses with multiple parameters. \*

- ☐ Strongly agree
- ☒ Agree
- ☐ Neutral
- ☐ Disagree
- ☐ Strongly Disagree

I find the WASPEC platform useful in creating personalised curriculums. \*

- ☐ Strongly agree
- ☐ Agree
- ☒ Neutral
- ☐ Disagree
- ☐ Strongly Disagree

Perceived Ease of use

Learning to work with the WASPEC platform would be easy for me. \*

- ☐ Strongly Agree
- ☒ Agree
- ☐ Neutral
- ☐ Disagree
- ☐ Strongly Disagree

I would find it easy to use the WASPEC platform to create multi-parameter personalised courses. \*

- ☐ Strongly Agree
- ☒ Agree
- ☐ Neutral
- ☐ Disagree
- ☐ Strongly Disagree

It would be easy to become skillful in the use of the WASPEC platform. \*

- ☒ Strongly Agree
- ☐ Agree
- ☐ Neutral
- ☐ Disagree
- ☐ Strongly Disagree

I would find the WASPEC platform easy and straightforward to use. \*

- ☐ Strongly Agree
- ☒ Agree
- ☐ Neutral
- ☐ Disagree
- ☐ Strongly Disagree

Perceived Intention to Use

If I had access to the WASPEC platform, I intend to adopt it. \*

- ☒ Strongly Agree
- ☐ Agree
- ☐ Neutral
- ☐ Disagree
- ☐ Strongly Disagree

I would tend to frequently use the WASPEC platform in creating personalised courses, if access is available. \*

- ☒ Strongly Agree
- ☐ Agree
- ☐ Neutral
- ☐ Disagree
- ☐ Strongly Disagree

Perceived Attitude Toward Using

Using the WASPEC platform in creating personalised learning environments has a positive influence. \*

- ☐ Strongly Agree
- ☒ Agree
- ☐ Neutral
- ☐ Disagree
- ☐ Strongly Disagree

Using the WASPEC platform is an innovative approach towards personalisation. \*

- ☐ Strongly Agree
- ☒ Agree
- ☐ Neutral
- ☐ Disagree
- ☐ Strongly Disagree

This content is neither created nor endorsed by Google.

Google Forms

# Evaluation of the WASPEC Platform

WASPEC is an E-learning platform (developed by customizing MOODLE) which provides personalized learning experiences for learners based on multiple parameters. The video describes the process of personalization as a course instructor or teacher. Please fill the short questionnaire that follow. Thanks!

For further reference, please read:

[https://www.researchgate.net/publication/338634901\\_A\\_Model\\_of\\_a\\_Weighted\\_Agent\\_System\\_for\\_Personalised\\_E-Learning\\_Curriculum](https://www.researchgate.net/publication/338634901_A_Model_of_a_Weighted_Agent_System_for_Personalised_E-Learning_Curriculum)

Please be informed that your response will be used (anonymously) as part of a research study on personalized learning. Participation in this study is completely voluntary. If you decide not to participate, there will not be any negative consequences. Please be aware that if you decide to participate, you may stop requesting your response to be retrieved. By submitting this questionnaire, you agree that your data can be used in the presentation of results in this study. Thanks

Email address \*

abbasamradu8@gmail.com

## The Design of WASPEC

### The Design of WASPEC

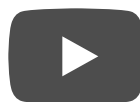

Name

Abbas H. Tarish

Institutional Affiliation \*

English natural language analysis

Position \*

☒ Professor/Teacher

☐ PhD Student/Course Instructor

☐ Other: .....

Comments/Reviews/Recommendations

Perceived Usefulness

Using the WASPEC platform increases productivity in selecting multiple parameters for personalisation with regards to available learning resources. \*

- ☐ Strongly agree
- ☐ Agree
- ☒ Neutral
- ☐ Disagree
- ☐ Strongly Disagree

Using the WASPEC platform to create multi-parameter personalised courses in a curriculum would increase teaching performance. \*

- ☐ Strongly agree
- ☒ Agree
- ☐ Neutral
- ☐ Disagree
- ☐ Strongly Disagree

Using the WASPEC platform would increase effectiveness in creating personalised courses with multiple parameters. \*

- ☐ Strongly agree
- ☒ Agree
- ☐ Neutral
- ☐ Disagree
- ☐ Strongly Disagree

I find the WASPEC platform useful in creating personalised curriculums. \*

- ☒ Strongly agree
- ☐ Agree
- ☐ Neutral
- ☐ Disagree
- ☐ Strongly Disagree

Perceived Ease of use

Learning to work with the WASPEC platform would be easy for me. \*

- ☒ Strongly Agree
- ☐ Agree
- ☐ Neutral
- ☐ Disagree
- ☐ Strongly Disagree

I would find it easy to use the WASPEC platform to create multi-parameter personalised courses. \*

- ☐ Strongly Agree
- ☐ Agree
- ☒ Neutral
- ☐ Disagree
- ☐ Strongly Disagree

It would be easy to become skillful in the use of the WASPEC platform. \*

- ☐ Strongly Agree
- ☐ Agree
- ☒ Neutral
- ☐ Disagree
- ☐ Strongly Disagree

I would find the WASPEC platform easy and straightforward to use. \*

- ☐ Strongly Agree
- ☒ Agree
- ☐ Neutral
- ☐ Disagree
- ☐ Strongly Disagree

Perceived Intention to Use

If I had access to the WASPEC platform, I intend to adopt it. \*

- ☐ Strongly Agree
- ☐ Agree
- ☒ Neutral
- ☐ Disagree
- ☐ Strongly Disagree

I would tend to frequently use the WASPEC platform in creating personalised courses, if access is available. \*

- ☐ Strongly Agree
- ☒ Agree
- ☐ Neutral
- ☐ Disagree
- ☐ Strongly Disagree

Perceived Attitude Toward Using

Using the WASPEC platform in creating personalised learning environments has a positive influence. \*

- ☒ Strongly Agree
- ☐ Agree
- ☐ Neutral
- ☐ Disagree
- ☐ Strongly Disagree

Using the WASPEC platform is an innovative approach towards personalisation. \*

- ☐ Strongly Agree
- ☐ Agree
- ☒ Neutral
- ☐ Disagree
- ☐ Strongly Disagree

This content is neither created nor endorsed by Google.

Google Forms

# Evaluation of the WASPEC Platform

WASPEC is an E-learning platform (developed by customizing MOODLE) which provides personalized learning experiences for learners based on multiple parameters. The video describes the process of personalization as a course instructor or teacher. Please fill the short questionnaire that follow. Thanks!

For further reference, please read:

[https://www.researchgate.net/publication/338634901\\_A\\_Model\\_of\\_a\\_Weighted\\_Agent\\_System\\_for\\_Personalised\\_E-Learning\\_Curriculum](https://www.researchgate.net/publication/338634901_A_Model_of_a_Weighted_Agent_System_for_Personalised_E-Learning_Curriculum)

Please be informed that your response will be used (anonymously) as part of a research study on personalized learning. Participation in this study is completely voluntary. If you decide not to participate, there will not be any negative consequences. Please be aware that if you decide to participate, you may stop requesting your response to be retrieved. By submitting this questionnaire, you agree that your data can be used in the presentation of results in this study. Thanks

Email address \*

mikkshebs@gmail.com

## The Design of WASPEC

### The Design of WASPEC

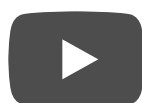

Name

Michael Moyosola Sheba

Institutional Affiliation \*

Universitate Politehnica din Bucuresti

Position \*

☐ Professor/Teacher

☒ PhD Student/Course Instructor

☐ Other: .....

Comments/Reviews/Recommendations

Perceived Usefulness

Using the WASPEC platform increases productivity in selecting multiple parameters for personalisation with regards to available learning resources. \*

- ☒ Strongly agree
- ☐ Agree
- ☐ Neutral
- ☐ Disagree
- ☐ Strongly Disagree

Using the WASPEC platform to create multi-parameter personalised courses in a curriculum would increase teaching performance. \*

- ☐ Strongly agree
- ☒ Agree
- ☐ Neutral
- ☐ Disagree
- ☐ Strongly Disagree

Using the WASPEC platform would increase effectiveness in creating personalised courses with multiple parameters. \*

- ☐ Strongly agree
- ☒ Agree
- ☐ Neutral
- ☐ Disagree
- ☐ Strongly Disagree

I find the WASPEC platform useful in creating personalised curriculums. \*

- ☐ Strongly agree
- ☒ Agree
- ☐ Neutral
- ☐ Disagree
- ☐ Strongly Disagree

Perceived Ease of use

Learning to work with the WASPEC platform would be easy for me. \*

- ☐ Strongly Agree
- ☒ Agree
- ☐ Neutral
- ☐ Disagree
- ☐ Strongly Disagree

I would find it easy to use the WASPEC platform to create multi-parameter personalised courses. \*

- ☐ Strongly Agree
- ☒ Agree
- ☐ Neutral
- ☐ Disagree
- ☐ Strongly Disagree

It would be easy to become skillful in the use of the WASPEC platform. \*

- ☐ Strongly Agree
- ☒ Agree
- ☐ Neutral
- ☐ Disagree
- ☐ Strongly Disagree

I would find the WASPEC platform easy and straightforward to use. \*

- ☐ Strongly Agree
- ☒ Agree
- ☐ Neutral
- ☐ Disagree
- ☐ Strongly Disagree

Perceived Intention to Use

If I had access to the WASPEC platform, I intend to adopt it. \*

- ☐ Strongly Agree
- ☒ Agree
- ☐ Neutral
- ☐ Disagree
- ☐ Strongly Disagree

I would tend to frequently use the WASPEC platform in creating personalised courses, if access is available. \*

- ☐ Strongly Agree
- ☒ Agree
- ☐ Neutral
- ☐ Disagree
- ☐ Strongly Disagree

Perceived Attitude Toward Using

Using the WASPEC platform in creating personalised learning environments has a positive influence. \*

- ☐ Strongly Agree
- ☒ Agree
- ☐ Neutral
- ☐ Disagree
- ☐ Strongly Disagree

Using the WASPEC platform is an innovative approach towards personalisation. \*

- ☐ Strongly Agree
- ☒ Agree
- ☐ Neutral
- ☐ Disagree
- ☐ Strongly Disagree

This content is neither created nor endorsed by Google.

Google Forms

# Evaluation of the WASPEC Platform

WASPEC is an E-learning platform (developed by customizing MOODLE) which provides personalized learning experiences for learners based on multiple parameters. The video describes the process of personalization as a course instructor or teacher. Please fill the short questionnaire that follow. Thanks!

For further reference, please read:

[https://www.researchgate.net/publication/338634901\\_A\\_Model\\_of\\_a\\_Weighted\\_Agent\\_System\\_for\\_Personalised\\_E-Learning\\_Curriculum](https://www.researchgate.net/publication/338634901_A_Model_of_a_Weighted_Agent_System_for_Personalised_E-Learning_Curriculum)

Please be informed that your response will be used (anonymously) as part of a research study on personalized learning. Participation in this study is completely voluntary. If you decide not to participate, there will not be any negative consequences. Please be aware that if you decide to participate, you may stop requesting your response to be retrieved. By submitting this questionnaire, you agree that your data can be used in the presentation of results in this study. Thanks

Email address \*

younes.zieita@gmail.com

## The Design of WASPEC

### The Design of WASPEC

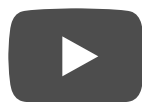

Name

Younes Zieita

Institutional Affiliation \*

8 Mai 1945 university of Guelma (Algeria)

Position \*

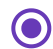

Professor/Teacher

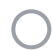

PhD Student/Course Instructor

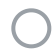

Other:

Comments/Reviews/Recommendations

Perceived Usefulness

Using the WASPEC platform increases productivity in selecting multiple parameters for personalisation with regards to available learning resources. \*

- ☐ Strongly agree
- ☐ Agree
- ☒ Neutral
- ☐ Disagree
- ☐ Strongly Disagree

Using the WASPEC platform to create multi-parameter personalised courses in a curriculum would increase teaching performance. \*

- ☐ Strongly agree
- ☒ Agree
- ☐ Neutral
- ☐ Disagree
- ☐ Strongly Disagree

Using the WASPEC platform would increase effectiveness in creating personalised courses with multiple parameters. \*

- ☐ Strongly agree
- ☒ Agree
- ☐ Neutral
- ☐ Disagree
- ☐ Strongly Disagree

I find the WASPEC platform useful in creating personalised curriculums. \*

- ☐ Strongly agree
- ☒ Agree
- ☐ Neutral
- ☐ Disagree
- ☐ Strongly Disagree

Perceived Ease of use

Learning to work with the WASPEC platform would be easy for me. \*

- ☐ Strongly Agree
- ☒ Agree
- ☐ Neutral
- ☐ Disagree
- ☐ Strongly Disagree

I would find it easy to use the WASPEC platform to create multi-parameter personalised courses. \*

- ☐ Strongly Agree
- ☒ Agree
- ☐ Neutral
- ☐ Disagree
- ☐ Strongly Disagree

It would be easy to become skillful in the use of the WASPEC platform. \*

- ☐ Strongly Agree
- ☐ Agree
- ☒ Neutral
- ☐ Disagree
- ☐ Strongly Disagree

I would find the WASPEC platform easy and straightforward to use. \*

- ☐ Strongly Agree
- ☒ Agree
- ☐ Neutral
- ☐ Disagree
- ☐ Strongly Disagree

Perceived Intention to Use

If I had access to the WASPEC platform, I intend to adopt it. \*

- ☐ Strongly Agree
- ☐ Agree
- ☐ Neutral
- ☒ Disagree
- ☐ Strongly Disagree

I would tend to frequently use the WASPEC platform in creating personalised courses, if access is available. \*

- ☐ Strongly Agree
- ☐ Agree
- ☒ Neutral
- ☐ Disagree
- ☐ Strongly Disagree

Perceived Attitude Toward Using

Using the WASPEC platform in creating personalised learning environments has a positive influence. \*

- ☐ Strongly Agree
- ☐ Agree
- ☒ Neutral
- ☐ Disagree
- ☐ Strongly Disagree

Using the WASPEC platform is an innovative approach towards personalisation. \*

- ☐ Strongly Agree
- ☒ Agree
- ☐ Neutral
- ☐ Disagree
- ☐ Strongly Disagree

This content is neither created nor endorsed by Google.

Google Forms

# Evaluation of the WASPEC Platform

WASPEC is an E-learning platform (developed by customizing MOODLE) which provides personalized learning experiences for learners based on multiple parameters. The video describes the process of personalization as a course instructor or teacher. Please fill the short questionnaire that follow. Thanks!

For further reference, please read:

[https://www.researchgate.net/publication/338634901\\_A\\_Model\\_of\\_a\\_Weighted\\_Agent\\_System\\_for\\_Personalised\\_E-Learning\\_Curriculum](https://www.researchgate.net/publication/338634901_A_Model_of_a_Weighted_Agent_System_for_Personalised_E-Learning_Curriculum)

Please be informed that your response will be used (anonymously) as part of a research study on personalized learning. Participation in this study is completely voluntary. If you decide not to participate, there will not be any negative consequences. Please be aware that if you decide to participate, you may stop requesting your response to be retrieved. By submitting this questionnaire, you agree that your data can be used in the presentation of results in this study. Thanks

Email address \*

eng.hibaakram@yahoo.com

## The Design of WASPEC

### The Design of WASPEC



Name

Hiba A. Abu-Alsaad

Institutional Affiliation \*

Mustansiriya University

Position \*

- ☐ Professor/Teacher
- ☐ PhD Student/Course Instructor
- ☒ Other: Lecturer in Mustansiriya University

Comments/Reviews/Recommendations

Perceived Usefulness

Using the WASPEC platform increases productivity in selecting multiple parameters for personalisation with regards to available learning resources. \*

- ☐ Strongly agree
- ☒ Agree
- ☐ Neutral
- ☐ Disagree
- ☐ Strongly Disagree

Using the WASPEC platform to create multi-parameter personalised courses in a curriculum would increase teaching performance. \*

- ☐ Strongly agree
- ☒ Agree
- ☐ Neutral
- ☐ Disagree
- ☐ Strongly Disagree

Using the WASPEC platform would increase effectiveness in creating personalised courses with multiple parameters. \*

- ☐ Strongly agree
- ☐ Agree
- ☒ Neutral
- ☐ Disagree
- ☐ Strongly Disagree

I find the WASPEC platform useful in creating personalised curriculums. \*

- ☐ Strongly agree
- ☐ Agree
- ☒ Neutral
- ☐ Disagree
- ☐ Strongly Disagree

Perceived Ease of use

Learning to work with the WASPEC platform would be easy for me. \*

- ☐ Strongly Agree
- ☒ Agree
- ☐ Neutral
- ☐ Disagree
- ☐ Strongly Disagree

I would find it easy to use the WASPEC platform to create multi-parameter personalised courses. \*

- ☐ Strongly Agree
- ☐ Agree
- ☒ Neutral
- ☐ Disagree
- ☐ Strongly Disagree

It would be easy to become skillful in the use of the WASPEC platform. \*

- ☐ Strongly Agree
- ☐ Agree
- ☒ Neutral
- ☐ Disagree
- ☐ Strongly Disagree

I would find the WASPEC platform easy and straightforward to use. \*

- ☐ Strongly Agree
- ☐ Agree
- ☒ Neutral
- ☐ Disagree
- ☐ Strongly Disagree

Perceived Intention to Use

If I had access to the WASPEC platform, I intend to adopt it. \*

- ☐ Strongly Agree
- ☒ Agree
- ☐ Neutral
- ☐ Disagree
- ☐ Strongly Disagree

I would tend to frequently use the WASPEC platform in creating personalised courses, if access is available. \*

- ☐ Strongly Agree
- ☒ Agree
- ☐ Neutral
- ☐ Disagree
- ☐ Strongly Disagree

Perceived Attitude Toward Using

Using the WASPEC platform in creating personalised learning environments has a positive influence. \*

- ☐ Strongly Agree
- ☒ Agree
- ☐ Neutral
- ☐ Disagree
- ☐ Strongly Disagree

Using the WASPEC platform is an innovative approach towards personalisation. \*

- ☐ Strongly Agree
- ☒ Agree
- ☐ Neutral
- ☐ Disagree
- ☐ Strongly Disagree

This content is neither created nor endorsed by Google.

Google Forms

# Evaluation of the WASPEC Platform

WASPEC is an E-learning platform (developed by customizing MOODLE) which provides personalized learning experiences for learners based on multiple parameters. The video describes the process of personalization as a course instructor or teacher. Please fill the short questionnaire that follow. Thanks!

For further reference, please read:

[https://www.researchgate.net/publication/338634901\\_A\\_Model\\_of\\_a\\_Weighted\\_Agent\\_System\\_for\\_Personalised\\_E-Learning\\_Curriculum](https://www.researchgate.net/publication/338634901_A_Model_of_a_Weighted_Agent_System_for_Personalised_E-Learning_Curriculum)

Please be informed that your response will be used (anonymously) as part of a research study on personalized learning. Participation in this study is completely voluntary. If you decide not to participate, there will not be any negative consequences. Please be aware that if you decide to participate, you may stop requesting your response to be retrieved. By submitting this questionnaire, you agree that your data can be used in the presentation of results in this study. Thanks

Email address \*

amir.ghavidel@lnu.se

## The Design of WASPEC

### The Design of WASPEC



Name

Amir Ghavidel

Institutional Affiliation \*

Researcher

Position \*

☐ Professor/Teacher

☒ PhD Student/Course Instructor

☐ Other: .....

Comments/Reviews/Recommendations

Perceived Usefulness

Using the WASPEC platform increases productivity in selecting multiple parameters for personalisation with regards to available learning resources. \*

- ☐ Strongly agree
- ☒ Agree
- ☐ Neutral
- ☐ Disagree
- ☐ Strongly Disagree

Using the WASPEC platform to create multi-parameter personalised courses in a curriculum would increase teaching performance. \*

- ☐ Strongly agree
- ☒ Agree
- ☐ Neutral
- ☐ Disagree
- ☐ Strongly Disagree

Using the WASPEC platform would increase effectiveness in creating personalised courses with multiple parameters. \*

- ☐ Strongly agree
- ☒ Agree
- ☐ Neutral
- ☐ Disagree
- ☐ Strongly Disagree

I find the WASPEC platform useful in creating personalised curriculums. \*

- ☐ Strongly agree
- ☒ Agree
- ☐ Neutral
- ☐ Disagree
- ☐ Strongly Disagree

Perceived Ease of use

Learning to work with the WASPEC platform would be easy for me. \*

- ☐ Strongly Agree
- ☒ Agree
- ☐ Neutral
- ☐ Disagree
- ☐ Strongly Disagree

I would find it easy to use the WASPEC platform to create multi-parameter personalised courses. \*

- ☐ Strongly Agree
- ☒ Agree
- ☐ Neutral
- ☐ Disagree
- ☐ Strongly Disagree

It would be easy to become skillful in the use of the WASPEC platform. \*

- ☐ Strongly Agree
- ☒ Agree
- ☐ Neutral
- ☐ Disagree
- ☐ Strongly Disagree

I would find the WASPEC platform easy and straightforward to use. \*

- ☐ Strongly Agree
- ☒ Agree
- ☐ Neutral
- ☐ Disagree
- ☐ Strongly Disagree

Perceived Intention to Use

If I had access to the WASPEC platform, I intend to adopt it. \*

- ☐ Strongly Agree
- ☒ Agree
- ☐ Neutral
- ☐ Disagree
- ☐ Strongly Disagree

I would tend to frequently use the WASPEC platform in creating personalised courses, if access is available. \*

- ☐ Strongly Agree
- ☒ Agree
- ☐ Neutral
- ☐ Disagree
- ☐ Strongly Disagree

Perceived Attitude Toward Using

Using the WASPEC platform in creating personalised learning environments has a positive influence. \*

- ☐ Strongly Agree
- ☒ Agree
- ☐ Neutral
- ☐ Disagree
- ☐ Strongly Disagree

Using the WASPEC platform is an innovative approach towards personalisation. \*

- ☐ Strongly Agree
- ☒ Agree
- ☐ Neutral
- ☐ Disagree
- ☐ Strongly Disagree

This content is neither created nor endorsed by Google.

Google Forms

# Evaluation of the WASPEC Platform

WASPEC is an E-learning platform (developed by customizing MOODLE) which provides personalized learning experiences for learners based on multiple parameters. The video describes the process of personalization as a course instructor or teacher. Please fill the short questionnaire that follow. Thanks!

For further reference, please read:

[https://www.researchgate.net/publication/338634901\\_A\\_Model\\_of\\_a\\_Weighted\\_Agent\\_System\\_for\\_Personalised\\_E-Learning\\_Curriculum](https://www.researchgate.net/publication/338634901_A_Model_of_a_Weighted_Agent_System_for_Personalised_E-Learning_Curriculum)

Please be informed that your response will be used (anonymously) as part of a research study on personalized learning. Participation in this study is completely voluntary. If you decide not to participate, there will not be any negative consequences. Please be aware that if you decide to participate, you may stop requesting your response to be retrieved. By submitting this questionnaire, you agree that your data can be used in the presentation of results in this study. Thanks

Email address \*

minaepourhadi@yahoo.com

## The Design of WASPEC

### The Design of WASPEC

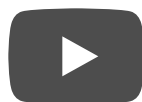

Name

Hadi H Minaeipour

Institutional Affiliation \*

www.fypacademy.com

Position \*

☐ Professor/Teacher

☐ PhD Student/Course Instructor

☒ Other: Founder

Comments/Reviews/Recommendations

Perceived Usefulness

Using the WASPEC platform increases productivity in selecting multiple parameters for personalisation with regards to available learning resources. \*

- ☒ Strongly agree
- ☐ Agree
- ☐ Neutral
- ☐ Disagree
- ☐ Strongly Disagree

Using the WASPEC platform to create multi-parameter personalised courses in a curriculum would increase teaching performance. \*

- ☒ Strongly agree
- ☐ Agree
- ☐ Neutral
- ☐ Disagree
- ☐ Strongly Disagree

Using the WASPEC platform would increase effectiveness in creating personalised courses with multiple parameters. \*

- ☒ Strongly agree
- ☐ Agree
- ☐ Neutral
- ☐ Disagree
- ☐ Strongly Disagree

I find the WASPEC platform useful in creating personalised curriculums. \*

- ☒ Strongly agree
- ☐ Agree
- ☐ Neutral
- ☐ Disagree
- ☐ Strongly Disagree

Perceived Ease of use

Learning to work with the WASPEC platform would be easy for me. \*

- ☒ Strongly Agree
- ☐ Agree
- ☐ Neutral
- ☐ Disagree
- ☐ Strongly Disagree

I would find it easy to use the WASPEC platform to create multi-parameter personalised courses. \*

- ☒ Strongly Agree
- ☐ Agree
- ☐ Neutral
- ☐ Disagree
- ☐ Strongly Disagree

It would be easy to become skillful in the use of the WASPEC platform. \*

- ☐ Strongly Agree
- ☒ Agree
- ☐ Neutral
- ☐ Disagree
- ☐ Strongly Disagree

I would find the WASPEC platform easy and straightforward to use. \*

- ☒ Strongly Agree
- ☐ Agree
- ☐ Neutral
- ☐ Disagree
- ☐ Strongly Disagree

Perceived Intention to Use

If I had access to the WASPEC platform, I intend to adopt it. \*

- ☒ Strongly Agree
- ☐ Agree
- ☐ Neutral
- ☐ Disagree
- ☐ Strongly Disagree

I would tend to frequently use the WASPEC platform in creating personalised courses, if access is available. \*

- ☒ Strongly Agree
- ☐ Agree
- ☐ Neutral
- ☐ Disagree
- ☐ Strongly Disagree

Perceived Attitude Toward Using

Using the WASPEC platform in creating personalised learning environments has a positive influence. \*

- ☒ Strongly Agree
- ☐ Agree
- ☐ Neutral
- ☐ Disagree
- ☐ Strongly Disagree

Using the WASPEC platform is an innovative approach towards personalisation. \*

- ☒ Strongly Agree
- ☐ Agree
- ☐ Neutral
- ☐ Disagree
- ☐ Strongly Disagree

This content is neither created nor endorsed by Google.

Google Forms

# Evaluation of the WASPEC Platform

WASPEC is an E-learning platform (developed by customizing MOODLE) which provides personalized learning experiences for learners based on multiple parameters. The video describes the process of personalization as a course instructor or teacher. Please fill the short questionnaire that follow. Thanks!

For further reference, please read:

[https://www.researchgate.net/publication/338634901\\_A\\_Model\\_of\\_a\\_Weighted\\_Agent\\_System\\_for\\_Personalised\\_E-Learning\\_Curriculum](https://www.researchgate.net/publication/338634901_A_Model_of_a_Weighted_Agent_System_for_Personalised_E-Learning_Curriculum)

Please be informed that your response will be used (anonymously) as part of a research study on personalized learning. Participation in this study is completely voluntary. If you decide not to participate, there will not be any negative consequences. Please be aware that if you decide to participate, you may stop requesting your response to be retrieved. By submitting this questionnaire, you agree that your data can be used in the presentation of results in this study. Thanks

Email address \*

ceraselacrisan@gmail.com

## The Design of WASPEC

### The Design of WASPEC

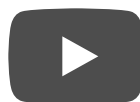

Name

.....

Institutional Affiliation \*

Vasile Alecsandri University of Bacau Romania

.....

Position \*

☒ Professor/Teacher

☐ PhD Student/Course Instructor

☐ Other: .....

Comments/Reviews/Recommendations

At 8.41 in the video there is a competency selection for the course module "Forum". Is this correct?  
It would be interesting if we could see two different users experience. How the same course is differently  
accessed based on different learner parameters.

.....

Perceived Usefulness

Using the WASPEC platform increases productivity in selecting multiple parameters for personalisation with regards to available learning resources. \*

- ☒ Strongly agree
- ☐ Agree
- ☐ Neutral
- ☐ Disagree
- ☐ Strongly Disagree

Using the WASPEC platform to create multi-parameter personalised courses in a curriculum would increase teaching performance. \*

- ☐ Strongly agree
- ☒ Agree
- ☐ Neutral
- ☐ Disagree
- ☐ Strongly Disagree

Using the WASPEC platform would increase effectiveness in creating personalised courses with multiple parameters. \*

- ☐ Strongly agree
- ☒ Agree
- ☐ Neutral
- ☐ Disagree
- ☐ Strongly Disagree

I find the WASPEC platform useful in creating personalised curriculums. \*

- ☒ Strongly agree
- ☐ Agree
- ☐ Neutral
- ☐ Disagree
- ☐ Strongly Disagree

Perceived Ease of use

Learning to work with the WASPEC platform would be easy for me. \*

- ☐ Strongly Agree
- ☒ Agree
- ☐ Neutral
- ☐ Disagree
- ☐ Strongly Disagree

I would find it easy to use the WASPEC platform to create multi-parameter personalised courses. \*

- ☐ Strongly Agree
- ☒ Agree
- ☐ Neutral
- ☐ Disagree
- ☐ Strongly Disagree

It would be easy to become skillful in the use of the WASPEC platform. \*

- ☐ Strongly Agree
- ☐ Agree
- ☒ Neutral
- ☐ Disagree
- ☐ Strongly Disagree

I would find the WASPEC platform easy and straightforward to use. \*

- ☐ Strongly Agree
- ☒ Agree
- ☐ Neutral
- ☐ Disagree
- ☐ Strongly Disagree

Perceived Intention to Use

If I had access to the WASPEC platform, I intend to adopt it. \*

- ☒ Strongly Agree
- ☐ Agree
- ☐ Neutral
- ☐ Disagree
- ☐ Strongly Disagree

I would tend to frequently use the WASPEC platform in creating personalised courses, if access is available. \*

- ☒ Strongly Agree
- ☐ Agree
- ☐ Neutral
- ☐ Disagree
- ☐ Strongly Disagree

Perceived Attitude Toward Using

Using the WASPEC platform in creating personalised learning environments has a positive influence. \*

- ☐ Strongly Agree
- ☒ Agree
- ☐ Neutral
- ☐ Disagree
- ☐ Strongly Disagree

Using the WASPEC platform is an innovative approach towards personalisation. \*

- ☒ Strongly Agree
- ☐ Agree
- ☐ Neutral
- ☐ Disagree
- ☐ Strongly Disagree

This content is neither created nor endorsed by Google.

Google Forms

# Evaluation of the WASPEC Platform

WASPEC is an E-learning platform (developed by customizing MOODLE) which provides personalized learning experiences for learners based on multiple parameters. The video describes the process of personalization as a course instructor or teacher. Please fill the short questionnaire that follow. Thanks!

For further reference, please read:

[https://www.researchgate.net/publication/338634901\\_A\\_Model\\_of\\_a\\_Weighted\\_Agent\\_System\\_for\\_Personalised\\_E-Learning\\_Curriculum](https://www.researchgate.net/publication/338634901_A_Model_of_a_Weighted_Agent_System_for_Personalised_E-Learning_Curriculum)

Please be informed that your response will be used (anonymously) as part of a research study on personalized learning. Participation in this study is completely voluntary. If you decide not to participate, there will not be any negative consequences. Please be aware that if you decide to participate, you may stop requesting your response to be retrieved. By submitting this questionnaire, you agree that your data can be used in the presentation of results in this study. Thanks

Email address \*

aqeel.hussein.it@gmail.com

## The Design of WASPEC

### The Design of WASPEC



Name

AQEEL Hussein

Institutional Affiliation \*

Craiova University

Position \*

☐ Professor/Teacher

☒ PhD Student/Course Instructor

☐ Other: .....

Comments/Reviews/Recommendations

Perceived Usefulness

Using the WASPEC platform increases productivity in selecting multiple parameters for personalisation with regards to available learning resources. \*

- ☐ Strongly agree
- ☒ Agree
- ☐ Neutral
- ☐ Disagree
- ☐ Strongly Disagree

Using the WASPEC platform to create multi-parameter personalised courses in a curriculum would increase teaching performance. \*

- ☒ Strongly agree
- ☐ Agree
- ☐ Neutral
- ☐ Disagree
- ☐ Strongly Disagree

Using the WASPEC platform would increase effectiveness in creating personalised courses with multiple parameters. \*

- ☐ Strongly agree
- ☒ Agree
- ☐ Neutral
- ☐ Disagree
- ☐ Strongly Disagree

I find the WASPEC platform useful in creating personalised curriculums. \*

- ☒ Strongly agree
- ☐ Agree
- ☐ Neutral
- ☐ Disagree
- ☐ Strongly Disagree

Perceived Ease of use

Learning to work with the WASPEC platform would be easy for me. \*

- ☒ Strongly Agree
- ☐ Agree
- ☐ Neutral
- ☐ Disagree
- ☐ Strongly Disagree

I would find it easy to use the WASPEC platform to create multi-parameter personalised courses. \*

- ☒ Strongly Agree
- ☐ Agree
- ☐ Neutral
- ☐ Disagree
- ☐ Strongly Disagree

It would be easy to become skillful in the use of the WASPEC platform. \*

- ☒ Strongly Agree
- ☐ Agree
- ☐ Neutral
- ☐ Disagree
- ☐ Strongly Disagree

I would find the WASPEC platform easy and straightforward to use. \*

- ☐ Strongly Agree
- ☒ Agree
- ☐ Neutral
- ☐ Disagree
- ☐ Strongly Disagree

Perceived Intention to Use

If I had access to the WASPEC platform, I intend to adopt it. \*

- ☒ Strongly Agree
- ☐ Agree
- ☐ Neutral
- ☐ Disagree
- ☐ Strongly Disagree

I would tend to frequently use the WASPEC platform in creating personalised courses, if access is available. \*

- ☒ Strongly Agree
- ☐ Agree
- ☐ Neutral
- ☐ Disagree
- ☐ Strongly Disagree

Perceived Attitude Toward Using

Using the WASPEC platform in creating personalised learning environments has a positive influence. \*

- ☐ Strongly Agree
- ☒ Agree
- ☐ Neutral
- ☐ Disagree
- ☐ Strongly Disagree

Using the WASPEC platform is an innovative approach towards personalisation. \*

- ☒ Strongly Agree
- ☐ Agree
- ☐ Neutral
- ☐ Disagree
- ☐ Strongly Disagree

This content is neither created nor endorsed by Google.

Google Forms

# Evaluation of the WASPEC Platform

WASPEC is an E-learning platform (developed by customizing MOODLE) which provides personalized learning experiences for learners based on multiple parameters. The video describes the process of personalization as a course instructor or teacher. Please fill the short questionnaire that follow. Thanks!

For further reference, please read:

[https://www.researchgate.net/publication/338634901\\_A\\_Model\\_of\\_a\\_Weighted\\_Agent\\_System\\_for\\_Personalised\\_E-Learning\\_Curriculum](https://www.researchgate.net/publication/338634901_A_Model_of_a_Weighted_Agent_System_for_Personalised_E-Learning_Curriculum)

Please be informed that your response will be used (anonymously) as part of a research study on personalized learning. Participation in this study is completely voluntary. If you decide not to participate, there will not be any negative consequences. Please be aware that if you decide to participate, you may stop requesting your response to be retrieved. By submitting this questionnaire, you agree that your data can be used in the presentation of results in this study. Thanks

Email address \*

ioana.pastinaru@uaic.ro

## The Design of WASPEC

### The Design of WASPEC



Name

Ioana-Carmen PASTINARU

Institutional Affiliation \*

"Alexandru Ioan Cuza" University of Iasi

Position \*

- ☐ Professor/Teacher
- ☐ PhD Student/Course Instructor
- ☒ Other: International Officer

Comments/Reviews/Recommendations

Perceived Usefulness

Using the WASPEC platform increases productivity in selecting multiple parameters for personalisation with regards to available learning resources. \*

- ☐ Strongly agree
- ☐ Agree
- ☒ Neutral
- ☐ Disagree
- ☐ Strongly Disagree

Using the WASPEC platform to create multi-parameter personalised courses in a curriculum would increase teaching performance. \*

- ☐ Strongly agree
- ☒ Agree
- ☐ Neutral
- ☐ Disagree
- ☐ Strongly Disagree

Using the WASPEC platform would increase effectiveness in creating personalised courses with multiple parameters. \*

- ☐ Strongly agree
- ☒ Agree
- ☐ Neutral
- ☐ Disagree
- ☐ Strongly Disagree

I find the WASPEC platform useful in creating personalised curriculums. \*

- ☐ Strongly agree
- ☒ Agree
- ☐ Neutral
- ☐ Disagree
- ☐ Strongly Disagree

Perceived Ease of use

Learning to work with the WASPEC platform would be easy for me. \*

- ☐ Strongly Agree
- ☒ Agree
- ☐ Neutral
- ☐ Disagree
- ☐ Strongly Disagree

I would find it easy to use the WASPEC platform to create multi-parameter personalised courses. \*

- ☐ Strongly Agree
- ☒ Agree
- ☐ Neutral
- ☐ Disagree
- ☐ Strongly Disagree

It would be easy to become skillful in the use of the WASPEC platform. \*

- ☐ Strongly Agree
- ☒ Agree
- ☐ Neutral
- ☐ Disagree
- ☐ Strongly Disagree

I would find the WASPEC platform easy and straightforward to use. \*

- ☐ Strongly Agree
- ☒ Agree
- ☐ Neutral
- ☐ Disagree
- ☐ Strongly Disagree

Perceived Intention to Use

If I had access to the WASPEC platform, I intend to adopt it. \*

- ☐ Strongly Agree
- ☒ Agree
- ☐ Neutral
- ☐ Disagree
- ☐ Strongly Disagree

I would tend to frequently use the WASPEC platform in creating personalised courses, if access is available. \*

- ☐ Strongly Agree
- ☒ Agree
- ☐ Neutral
- ☐ Disagree
- ☐ Strongly Disagree

Perceived Attitude Toward Using

Using the WASPEC platform in creating personalised learning environments has a positive influence. \*

- ☐ Strongly Agree
- ☒ Agree
- ☐ Neutral
- ☐ Disagree
- ☐ Strongly Disagree

Using the WASPEC platform is an innovative approach towards personalisation. \*

- ☐ Strongly Agree
- ☒ Agree
- ☐ Neutral
- ☐ Disagree
- ☐ Strongly Disagree

This content is neither created nor endorsed by Google.

Google Forms

# Evaluation of the WASPEC Platform

WASPEC is an E-learning platform (developed by customizing MOODLE) which provides personalized learning experiences for learners based on multiple parameters. The video describes the process of personalization as a course instructor or teacher. Please fill the short questionnaire that follow. Thanks!

For further reference, please read:

[https://www.researchgate.net/publication/338634901\\_A\\_Model\\_of\\_a\\_Weighted\\_Agent\\_System\\_for\\_Personalised\\_E-Learning\\_Curriculum](https://www.researchgate.net/publication/338634901_A_Model_of_a_Weighted_Agent_System_for_Personalised_E-Learning_Curriculum)

Please be informed that your response will be used (anonymously) as part of a research study on personalized learning. Participation in this study is completely voluntary. If you decide not to participate, there will not be any negative consequences. Please be aware that if you decide to participate, you may stop requesting your response to be retrieved. By submitting this questionnaire, you agree that your data can be used in the presentation of results in this study. Thanks

Email address \*

remmobed@gmail.com

## The Design of WASPEC

### The Design of WASPEC



Name

Emmanuel Obed

Institutional Affiliation \*

Alexandru Ioan Cuza university din iasi

Position \*

☐ Professor/Teacher

☒ PhD Student/Course Instructor

☐ Other: .....

Comments/Reviews/Recommendations

Perceived Usefulness

Using the WASPEC platform increases productivity in selecting multiple parameters for personalisation with regards to available learning resources. \*

- ☐ Strongly agree
- ☒ Agree
- ☐ Neutral
- ☐ Disagree
- ☐ Strongly Disagree

Using the WASPEC platform to create multi-parameter personalised courses in a curriculum would increase teaching performance. \*

- ☒ Strongly agree
- ☐ Agree
- ☐ Neutral
- ☐ Disagree
- ☐ Strongly Disagree

Using the WASPEC platform would increase effectiveness in creating personalised courses with multiple parameters. \*

- ☒ Strongly agree
- ☐ Agree
- ☐ Neutral
- ☐ Disagree
- ☐ Strongly Disagree

I find the WASPEC platform useful in creating personalised curriculums. \*

- ☒ Strongly agree
- ☐ Agree
- ☐ Neutral
- ☐ Disagree
- ☐ Strongly Disagree

Perceived Ease of use

Learning to work with the WASPEC platform would be easy for me. \*

- ☒ Strongly Agree
- ☐ Agree
- ☐ Neutral
- ☐ Disagree
- ☐ Strongly Disagree

I would find it easy to use the WASPEC platform to create multi-parameter personalised courses. \*

- ☒ Strongly Agree
- ☐ Agree
- ☐ Neutral
- ☐ Disagree
- ☐ Strongly Disagree

It would be easy to become skillful in the use of the WASPEC platform. \*

- ☒ Strongly Agree
- ☐ Agree
- ☐ Neutral
- ☐ Disagree
- ☐ Strongly Disagree

I would find the WASPEC platform easy and straightforward to use. \*

- ☒ Strongly Agree
- ☐ Agree
- ☐ Neutral
- ☐ Disagree
- ☐ Strongly Disagree

Perceived Intention to Use

If I had access to the WASPEC platform, I intend to adopt it. \*

- ☒ Strongly Agree
- ☐ Agree
- ☐ Neutral
- ☐ Disagree
- ☐ Strongly Disagree

I would tend to frequently use the WASPEC platform in creating personalised courses, if access is available. \*

- ☒ Strongly Agree
- ☐ Agree
- ☐ Neutral
- ☐ Disagree
- ☐ Strongly Disagree

Perceived Attitude Toward Using

Using the WASPEC platform in creating personalised learning environments has a positive influence. \*

- ☒ Strongly Agree
- ☐ Agree
- ☐ Neutral
- ☐ Disagree
- ☐ Strongly Disagree

Using the WASPEC platform is an innovative approach towards personalisation. \*

- ☒ Strongly Agree
- ☐ Agree
- ☐ Neutral
- ☐ Disagree
- ☐ Strongly Disagree

This content is neither created nor endorsed by Google.

Google Forms

# Evaluation of the WASPEC Platform

WASPEC is an E-learning platform (developed by customizing MOODLE) which provides personalized learning experiences for learners based on multiple parameters. The video describes the process of personalization as a course instructor or teacher. Please fill the short questionnaire that follow. Thanks!

For further reference, please read:

[https://www.researchgate.net/publication/338634901\\_A\\_Model\\_of\\_a\\_Weighted\\_Agent\\_System\\_for\\_Personalised\\_E-Learning\\_Curriculum](https://www.researchgate.net/publication/338634901_A_Model_of_a_Weighted_Agent_System_for_Personalised_E-Learning_Curriculum)

Please be informed that your response will be used (anonymously) as part of a research study on personalized learning. Participation in this study is completely voluntary. If you decide not to participate, there will not be any negative consequences. Please be aware that if you decide to participate, you may stop requesting your response to be retrieved. By submitting this questionnaire, you agree that your data can be used in the presentation of results in this study. Thanks

Email address \*

Tarek.Sekrafi@gmail.com

## The Design of WASPEC

### The Design of WASPEC

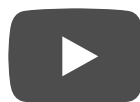

Name

Tarek SEKRAFI

Institutional Affiliation \*

Center for Research in Microelectronic and Nanotechnology CRMN

Position \*

☒ Professor/Teacher

☐ PhD Student/Course Instructor

☐ Other: .....

Comments/Reviews/Recommendations

Strangely accepted

Perceived Usefulness

Using the WASPEC platform increases productivity in selecting multiple parameters for personalisation with regards to available learning resources. \*

- ☒ Strongly agree
- ☐ Agree
- ☐ Neutral
- ☐ Disagree
- ☐ Strongly Disagree

Using the WASPEC platform to create multi-parameter personalised courses in a curriculum would increase teaching performance. \*

- ☒ Strongly agree
- ☐ Agree
- ☐ Neutral
- ☐ Disagree
- ☐ Strongly Disagree

Using the WASPEC platform would increase effectiveness in creating personalised courses with multiple parameters. \*

- ☐ Strongly agree
- ☒ Agree
- ☐ Neutral
- ☐ Disagree
- ☐ Strongly Disagree

I find the WASPEC platform useful in creating personalised curriculums. \*

- ☒ Strongly agree
- ☐ Agree
- ☐ Neutral
- ☐ Disagree
- ☐ Strongly Disagree

Perceived Ease of use

Learning to work with the WASPEC platform would be easy for me. \*

- ☒ Strongly Agree
- ☐ Agree
- ☐ Neutral
- ☐ Disagree
- ☐ Strongly Disagree

I would find it easy to use the WASPEC platform to create multi-parameter personalised courses. \*

- ☐ Strongly Agree
- ☒ Agree
- ☐ Neutral
- ☐ Disagree
- ☐ Strongly Disagree

It would be easy to become skillful in the use of the WASPEC platform. \*

- ☐ Strongly Agree
- ☒ Agree
- ☐ Neutral
- ☐ Disagree
- ☐ Strongly Disagree

I would find the WASPEC platform easy and straightforward to use. \*

- ☒ Strongly Agree
- ☐ Agree
- ☐ Neutral
- ☐ Disagree
- ☐ Strongly Disagree

Perceived Intention to Use

If I had access to the WASPEC platform, I intend to adopt it. \*

- ☒ Strongly Agree
- ☐ Agree
- ☐ Neutral
- ☐ Disagree
- ☐ Strongly Disagree

I would tend to frequently use the WASPEC platform in creating personalised courses, if access is available. \*

- ☒ Strongly Agree
- ☐ Agree
- ☐ Neutral
- ☐ Disagree
- ☐ Strongly Disagree

Perceived Attitude Toward Using

Using the WASPEC platform in creating personalised learning environments has a positive influence. \*

- ☒ Strongly Agree
- ☐ Agree
- ☐ Neutral
- ☐ Disagree
- ☐ Strongly Disagree

Using the WASPEC platform is an innovative approach towards personalisation. \*

- ☐ Strongly Agree
- ☒ Agree
- ☐ Neutral
- ☐ Disagree
- ☐ Strongly Disagree

This content is neither created nor endorsed by Google.

Google Forms

# Evaluation of the WASPEC Platform

WASPEC is an E-learning platform (developed by customizing MOODLE) which provides personalized learning experiences for learners based on multiple parameters. The video describes the process of personalization as a course instructor or teacher. Please fill the short questionnaire that follow. Thanks!

For further reference, please read:

[https://www.researchgate.net/publication/338634901\\_A\\_Model\\_of\\_a\\_Weighted\\_Agent\\_System\\_for\\_Personalised\\_E-Learning\\_Curriculum](https://www.researchgate.net/publication/338634901_A_Model_of_a_Weighted_Agent_System_for_Personalised_E-Learning_Curriculum)

Please be informed that your response will be used (anonymously) as part of a research study on personalized learning. Participation in this study is completely voluntary. If you decide not to participate, there will not be any negative consequences. Please be aware that if you decide to participate, you may stop requesting your response to be retrieved. By submitting this questionnaire, you agree that your data can be used in the presentation of results in this study. Thanks

Email address \*

andreinaku@gmail.com

## The Design of WASPEC

### The Design of WASPEC

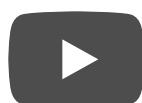

Name

Andrei Nacu

Institutional Affiliation \*

"Alexandru Ioan Cuza" University of Iași

Position \*

☐ Professor/Teacher

☒ PhD Student/Course Instructor

☐ Other: .....

Comments/Reviews/Recommendations

\* Give a shorter and more concise presentation about the problem at hand. Say what you're research is FOR.

\* Give examples of (if any) competitive products you have researched.

\* Scroll slower and explain what you are trying to do exactly. Try to explain ambiguous abbreviations from the user interface.

\* Maybe present a link or a short introduction about the Felder-Silverman Learning Model, to accomodate the ones listening.

\* Try to make some explanations a bit shorter and don't have dead-times (like the ones on the end of the presentation, where you try to login). Don't be ashamed to "film" more than one take.

Perceived Usefulness

Using the WASPEC platform increases productivity in selecting multiple parameters for personalisation with regards to available learning resources. \*

- ☐ Strongly agree
- ☐ Agree
- ☒ Neutral
- ☐ Disagree
- ☐ Strongly Disagree

Using the WASPEC platform to create multi-parameter personalised courses in a curriculum would increase teaching performance. \*

- ☐ Strongly agree
- ☒ Agree
- ☐ Neutral
- ☐ Disagree
- ☐ Strongly Disagree

Using the WASPEC platform would increase effectiveness in creating personalised courses with multiple parameters. \*

- ☐ Strongly agree
- ☒ Agree
- ☐ Neutral
- ☐ Disagree
- ☐ Strongly Disagree

I find the WASPEC platform useful in creating personalised curriculums. \*

- ☐ Strongly agree
- ☐ Agree
- ☒ Neutral
- ☐ Disagree
- ☐ Strongly Disagree

Perceived Ease of use

Learning to work with the WASPEC platform would be easy for me. \*

- ☐ Strongly Agree
- ☐ Agree
- ☒ Neutral
- ☐ Disagree
- ☐ Strongly Disagree

I would find it easy to use the WASPEC platform to create multi-parameter personalised courses. \*

- ☐ Strongly Agree
- ☐ Agree
- ☒ Neutral
- ☐ Disagree
- ☐ Strongly Disagree

It would be easy to become skillful in the use of the WASPEC platform. \*

- ☐ Strongly Agree
- ☒ Agree
- ☐ Neutral
- ☐ Disagree
- ☐ Strongly Disagree

I would find the WASPEC platform easy and straightforward to use. \*

- ☐ Strongly Agree
- ☐ Agree
- ☐ Neutral
- ☒ Disagree
- ☐ Strongly Disagree

Perceived Intention to Use

If I had access to the WASPEC platform, I intend to adopt it. \*

- ☐ Strongly Agree
- ☐ Agree
- ☒ Neutral
- ☐ Disagree
- ☐ Strongly Disagree

I would tend to frequently use the WASPEC platform in creating personalised courses, if access is available. \*

- ☐ Strongly Agree
- ☒ Agree
- ☐ Neutral
- ☐ Disagree
- ☐ Strongly Disagree

Perceived Attitude Toward Using

Using the WASPEC platform in creating personalised learning environments has a positive influence. \*

- ☐ Strongly Agree
- ☒ Agree
- ☐ Neutral
- ☐ Disagree
- ☐ Strongly Disagree

Using the WASPEC platform is an innovative approach towards personalisation. \*

- ☐ Strongly Agree
- ☐ Agree
- ☒ Neutral
- ☐ Disagree
- ☐ Strongly Disagree

This content is neither created nor endorsed by Google.

Google Forms

# Evaluation of the WASPEC Platform

WASPEC is an E-learning platform (developed by customizing MOODLE) which provides personalized learning experiences for learners based on multiple parameters. The video describes the process of personalization as a course instructor or teacher. Please fill the short questionnaire that follow. Thanks!

For further reference, please read:

[https://www.researchgate.net/publication/338634901\\_A\\_Model\\_of\\_a\\_Weighted\\_Agent\\_System\\_for\\_Personalised\\_E-Learning\\_Curriculum](https://www.researchgate.net/publication/338634901_A_Model_of_a_Weighted_Agent_System_for_Personalised_E-Learning_Curriculum)

Please be informed that your response will be used (anonymously) as part of a research study on personalized learning. Participation in this study is completely voluntary. If you decide not to participate, there will not be any negative consequences. Please be aware that if you decide to participate, you may stop requesting your response to be retrieved. By submitting this questionnaire, you agree that your data can be used in the presentation of results in this study. Thanks

Email address \*

soukaina.ennouamani@edu.uiz.ac.ma

## The Design of WASPEC

### The Design of WASPEC

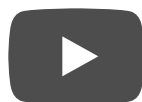

Name

Soukaina Ennouamani

Institutional Affiliation \*

Ibn Zohr University

Position \*

☐ Professor/Teacher

☒ PhD Student/Course Instructor

☐ Other: .....

Comments/Reviews/Recommendations

I would recommande to track the progress of the knowledge level after each activity in order to take it into consideration in the adaptation

Perceived Usefulness

Using the WASPEC platform increases productivity in selecting multiple parameters for personalisation with regards to available learning resources. \*

- ☐ Strongly agree
- ☒ Agree
- ☐ Neutral
- ☐ Disagree
- ☐ Strongly Disagree

Using the WASPEC platform to create multi-parameter personalised courses in a curriculum would increase teaching performance. \*

- ☐ Strongly agree
- ☒ Agree
- ☐ Neutral
- ☐ Disagree
- ☐ Strongly Disagree

Using the WASPEC platform would increase effectiveness in creating personalised courses with multiple parameters. \*

- ☐ Strongly agree
- ☒ Agree
- ☐ Neutral
- ☐ Disagree
- ☐ Strongly Disagree

I find the WASPEC platform useful in creating personalised curriculums. \*

- ☒ Strongly agree
- ☐ Agree
- ☐ Neutral
- ☐ Disagree
- ☐ Strongly Disagree

Perceived Ease of use

Learning to work with the WASPEC platform would be easy for me. \*

- ☐ Strongly Agree
- ☒ Agree
- ☐ Neutral
- ☐ Disagree
- ☐ Strongly Disagree

I would find it easy to use the WASPEC platform to create multi-parameter personalised courses. \*

- ☐ Strongly Agree
- ☒ Agree
- ☐ Neutral
- ☐ Disagree
- ☐ Strongly Disagree

It would be easy to become skillful in the use of the WASPEC platform. \*

- ☐ Strongly Agree
- ☐ Agree
- ☒ Neutral
- ☐ Disagree
- ☐ Strongly Disagree

I would find the WASPEC platform easy and straightforward to use. \*

- ☐ Strongly Agree
- ☒ Agree
- ☐ Neutral
- ☐ Disagree
- ☐ Strongly Disagree

Perceived Intention to Use

If I had access to the WASPEC platform, I intend to adopt it. \*

- ☐ Strongly Agree
- ☒ Agree
- ☐ Neutral
- ☐ Disagree
- ☐ Strongly Disagree

I would tend to frequently use the WASPEC platform in creating personalised courses, if access is available. \*

- ☒ Strongly Agree
- ☐ Agree
- ☐ Neutral
- ☐ Disagree
- ☐ Strongly Disagree

Perceived Attitude Toward Using

Using the WASPEC platform in creating personalised learning environments has a positive influence. \*

- ☒ Strongly Agree
- ☐ Agree
- ☐ Neutral
- ☐ Disagree
- ☐ Strongly Disagree

Using the WASPEC platform is an innovative approach towards personalisation. \*

- ☐ Strongly Agree
- ☒ Agree
- ☐ Neutral
- ☐ Disagree
- ☐ Strongly Disagree

This content is neither created nor endorsed by Google.

Google Forms

# Evaluation of the WASPEC Platform

WASPEC is an E-learning platform (developed by customizing MOODLE) which provides personalized learning experiences for learners based on multiple parameters. The video describes the process of personalization as a course instructor or teacher. Please fill the short questionnaire that follow. Thanks!

For further reference, please read:

[https://www.researchgate.net/publication/338634901\\_A\\_Model\\_of\\_a\\_Weighted\\_Agent\\_System\\_for\\_Personalised\\_E-Learning\\_Curriculum](https://www.researchgate.net/publication/338634901_A_Model_of_a_Weighted_Agent_System_for_Personalised_E-Learning_Curriculum)

Please be informed that your response will be used (anonymously) as part of a research study on personalized learning. Participation in this study is completely voluntary. If you decide not to participate, there will not be any negative consequences. Please be aware that if you decide to participate, you may stop requesting your response to be retrieved. By submitting this questionnaire, you agree that your data can be used in the presentation of results in this study. Thanks

Email address \*

dr.mirela.mihalcia@gmail.com

## The Design of WASPEC

### The Design of WASPEC



Name

Mihalcia Mihaela Mirela

Institutional Affiliation \*

Hospital Sfantul Spiridon

Position \*

- ☐ Professor/Teacher
- ☐ PhD Student/Course Instructor
- ☒ Other: Medic resident

Comments/Reviews/Recommendations

Perceived Usefulness

Using the WASPEC platform increases productivity in selecting multiple parameters for personalisation with regards to available learning resources. \*

- ☐ Strongly agree
- ☒ Agree
- ☐ Neutral
- ☐ Disagree
- ☐ Strongly Disagree

Using the WASPEC platform to create multi-parameter personalised courses in a curriculum would increase teaching performance. \*

- ☐ Strongly agree
- ☒ Agree
- ☐ Neutral
- ☐ Disagree
- ☐ Strongly Disagree

Using the WASPEC platform would increase effectiveness in creating personalised courses with multiple parameters. \*

- ☐ Strongly agree
- ☐ Agree
- ☒ Neutral
- ☐ Disagree
- ☐ Strongly Disagree

I find the WASPEC platform useful in creating personalised curriculums. \*

- ☐ Strongly agree
- ☒ Agree
- ☐ Neutral
- ☐ Disagree
- ☐ Strongly Disagree

Perceived Ease of use

Learning to work with the WASPEC platform would be easy for me. \*

- ☐ Strongly Agree
- ☐ Agree
- ☐ Neutral
- ☒ Disagree
- ☐ Strongly Disagree

I would find it easy to use the WASPEC platform to create multi-parameter personalised courses. \*

- ☐ Strongly Agree
- ☐ Agree
- ☐ Neutral
- ☐ Disagree
- ☒ Strongly Disagree

It would be easy to become skillful in the use of the WASPEC platform. \*

- ☐ Strongly Agree
- ☐ Agree
- ☒ Neutral
- ☐ Disagree
- ☐ Strongly Disagree

I would find the WASPEC platform easy and straightforward to use. \*

- ☐ Strongly Agree
- ☐ Agree
- ☐ Neutral
- ☒ Disagree
- ☐ Strongly Disagree

Perceived Intention to Use

If I had access to the WASPEC platform, I intend to adopt it. \*

- ☐ Strongly Agree
- ☐ Agree
- ☐ Neutral
- ☒ Disagree
- ☐ Strongly Disagree

I would tend to frequently use the WASPEC platform in creating personalised courses, if access is available. \*

- ☐ Strongly Agree
- ☐ Agree
- ☐ Neutral
- ☒ Disagree
- ☐ Strongly Disagree

Perceived Attitude Toward Using

Using the WASPEC platform in creating personalised learning environments has a positive influence. \*

- ☐ Strongly Agree
- ☒ Agree
- ☐ Neutral
- ☐ Disagree
- ☐ Strongly Disagree

Using the WASPEC platform is an innovative approach towards personalisation. \*

- ☒ Strongly Agree
- ☐ Agree
- ☐ Neutral
- ☐ Disagree
- ☐ Strongly Disagree

This content is neither created nor endorsed by Google.

Google Forms

# Evaluation of the WASPEC Platform

WASPEC is an E-learning platform (developed by customizing MOODLE) which provides personalized learning experiences for learners based on multiple parameters. The video describes the process of personalization as a course instructor or teacher. Please fill the short questionnaire that follow. Thanks!

For further reference, please read:

[https://www.researchgate.net/publication/338634901\\_A\\_Model\\_of\\_a\\_Weighted\\_Agent\\_System\\_for\\_Personalised\\_E-Learning\\_Curriculum](https://www.researchgate.net/publication/338634901_A_Model_of_a_Weighted_Agent_System_for_Personalised_E-Learning_Curriculum)

Please be informed that your response will be used (anonymously) as part of a research study on personalized learning. Participation in this study is completely voluntary. If you decide not to participate, there will not be any negative consequences. Please be aware that if you decide to participate, you may stop requesting your response to be retrieved. By submitting this questionnaire, you agree that your data can be used in the presentation of results in this study. Thanks

Email address \*

elena.tanase@uaic.ro

## The Design of WASPEC

### The Design of WASPEC



Name

Violeta Tanase

Institutional Affiliation \*

Alexandru Ioan Cuza University of Iasi

Position \*

- ☐ Professor/Teacher
- ☐ PhD Student/Course Instructor
- ☒ Other: administrative staff

Comments/Reviews/Recommendations

Perceived Usefulness

Using the WASPEC platform increases productivity in selecting multiple parameters for personalisation with regards to available learning resources. \*

- ☒ Strongly agree
- ☐ Agree
- ☐ Neutral
- ☐ Disagree
- ☐ Strongly Disagree

Using the WASPEC platform to create multi-parameter personalised courses in a curriculum would increase teaching performance. \*

- ☒ Strongly agree
- ☐ Agree
- ☐ Neutral
- ☐ Disagree
- ☐ Strongly Disagree

Using the WASPEC platform would increase effectiveness in creating personalised courses with multiple parameters. \*

- ☒ Strongly agree
- ☐ Agree
- ☐ Neutral
- ☐ Disagree
- ☐ Strongly Disagree

I find the WASPEC platform useful in creating personalised curriculums. \*

- ☒ Strongly agree
- ☐ Agree
- ☐ Neutral
- ☐ Disagree
- ☐ Strongly Disagree

Perceived Ease of use

Learning to work with the WASPEC platform would be easy for me. \*

- ☐ Strongly Agree
- ☒ Agree
- ☐ Neutral
- ☐ Disagree
- ☐ Strongly Disagree

I would find it easy to use the WASPEC platform to create multi-parameter personalised courses. \*

- ☐ Strongly Agree
- ☒ Agree
- ☐ Neutral
- ☐ Disagree
- ☐ Strongly Disagree

It would be easy to become skillful in the use of the WASPEC platform. \*

- ☐ Strongly Agree
- ☒ Agree
- ☐ Neutral
- ☐ Disagree
- ☐ Strongly Disagree

I would find the WASPEC platform easy and straightforward to use. \*

- ☐ Strongly Agree
- ☒ Agree
- ☐ Neutral
- ☐ Disagree
- ☐ Strongly Disagree

Perceived Intention to Use

If I had access to the WASPEC platform, I intend to adopt it. \*

- ☐ Strongly Agree
- ☒ Agree
- ☐ Neutral
- ☐ Disagree
- ☐ Strongly Disagree

I would tend to frequently use the WASPEC platform in creating personalised courses, if access is available. \*

- ☐ Strongly Agree
- ☒ Agree
- ☐ Neutral
- ☐ Disagree
- ☐ Strongly Disagree

Perceived Attitude Toward Using

Using the WASPEC platform in creating personalised learning environments has a positive influence. \*

- ☒ Strongly Agree
- ☐ Agree
- ☐ Neutral
- ☐ Disagree
- ☐ Strongly Disagree

Using the WASPEC platform is an innovative approach towards personalisation. \*

- ☒ Strongly Agree
- ☐ Agree
- ☐ Neutral
- ☐ Disagree
- ☐ Strongly Disagree

This content is neither created nor endorsed by Google.

Google Forms

# Evaluation of the WASPEC Platform

WASPEC is an E-learning platform (developed by customizing MOODLE) which provides personalized learning experiences for learners based on multiple parameters. The video describes the process of personalization as a course instructor or teacher. Please fill the short questionnaire that follow. Thanks!

For further reference, please read:

[https://www.researchgate.net/publication/338634901\\_A\\_Model\\_of\\_a\\_Weighted\\_Agent\\_System\\_for\\_Personalised\\_E-Learning\\_Curriculum](https://www.researchgate.net/publication/338634901_A_Model_of_a_Weighted_Agent_System_for_Personalised_E-Learning_Curriculum)

Please be informed that your response will be used (anonymously) as part of a research study on personalized learning. Participation in this study is completely voluntary. If you decide not to participate, there will not be any negative consequences. Please be aware that if you decide to participate, you may stop requesting your response to be retrieved. By submitting this questionnaire, you agree that your data can be used in the presentation of results in this study. Thanks

Email address \*

dcristea@info.uaic.ro

## The Design of WASPEC

### The Design of WASPEC



Name

Dan Cristea

Institutional Affiliation \*

Alexandru Ioan Cuza University of Iasi

Position \*

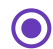

Professor/Teacher

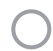

PhD Student/Course Instructor

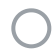

Other:

## Comments/Reviews/Recommendations

I disliked the presentation: in short, too many features presented at once. If addressed to computer scientists, only those having previous experience with Moodle or other e-learning platforms could be receptive, to all others the exposure is incomprehensible. If addressed to foreign language teachers, the technical part (as for instance, the architecture presented at the beginning) is useless.

Moreover, there are long periods in which there is nothing happening on the screen, which is discouraging for the listener in a video interaction.

The user has the feeling that configuring such a system is very cumbersome, and the result is hidden in too many details. There is no evidence to what has been achieved through this process of customisation.

I would configure instead two types of presentations, one for advanced Moodle experts, one for teachers. I would leave active only a few features and show the immediate benefit that the platform offer by manipulating them.

It is also unclear what are the new functionalities of this platform as compared to what is already included in a standard Moodle interface.

With respect to this questionnaire, many questions, as those in the chapter "Perceived Ease of use", are redundant: they mean the same, only put in different words. In the next section, "Using the WASPEC platform in creating personalised learning environments has a positive influence." => positive influence on whom? Being it the user or the student, a "positive influence" is not what is really expected, because no one expects influencing the character of users... but rather performance and new benefits.

## Perceived Usefulness

Using the WASPEC platform increases productivity in selecting multiple parameters for personalisation with regards to available learning resources. \*

- ☐ Strongly agree
- ☐ Agree
- ☒ Neutral
- ☐ Disagree
- ☐ Strongly Disagree

Using the WASPEC platform to create multi-parameter personalised courses in a curriculum would increase teaching performance. \*

- ☐ Strongly agree
- ☐ Agree
- ☒ Neutral
- ☐ Disagree
- ☐ Strongly Disagree

Using the WASPEC platform would increase effectiveness in creating personalised courses with multiple parameters. \*

- ☐ Strongly agree
- ☐ Agree
- ☒ Neutral
- ☐ Disagree
- ☐ Strongly Disagree

I find the WASPEC platform useful in creating personalised curriculums. \*

- ☐ Strongly agree
- ☐ Agree
- ☒ Neutral
- ☐ Disagree
- ☐ Strongly Disagree

Perceived Ease of use

Learning to work with the WASPEC platform would be easy for me. \*

- ☐ Strongly Agree
- ☐ Agree
- ☒ Neutral
- ☐ Disagree
- ☐ Strongly Disagree

I would find it easy to use the WASPEC platform to create multi-parameter personalised courses. \*

- ☐ Strongly Agree
- ☐ Agree
- ☒ Neutral
- ☐ Disagree
- ☐ Strongly Disagree

It would be easy to become skillful in the use of the WASPEC platform. \*

- ☐ Strongly Agree
- ☐ Agree
- ☒ Neutral
- ☐ Disagree
- ☐ Strongly Disagree

I would find the WASPEC platform easy and straightforward to use. \*

- ☐ Strongly Agree
- ☐ Agree
- ☒ Neutral
- ☐ Disagree
- ☐ Strongly Disagree

#### Perceived Intention to Use

If I had access to the WASPEC platform, I intend to adopt it. \*

- ☐ Strongly Agree
- ☐ Agree
- ☒ Neutral
- ☐ Disagree
- ☐ Strongly Disagree

I would tend to frequently use the WASPEC platform in creating personalised courses, if access is available. \*

- ☐ Strongly Agree
- ☐ Agree
- ☒ Neutral
- ☐ Disagree
- ☐ Strongly Disagree

#### Perceived Attitude Toward Using

Using the WASPEC platform in creating personalised learning environments has a positive influence. \*

- ☐ Strongly Agree
- ☐ Agree
- ☒ Neutral
- ☐ Disagree
- ☐ Strongly Disagree

Using the WASPEC platform is an innovative approach towards personalisation. \*

- ☐ Strongly Agree
- ☐ Agree
- ☒ Neutral
- ☐ Disagree
- ☐ Strongly Disagree

This content is neither created nor endorsed by Google.

Google Forms

# Evaluation of the WASPEC Platform

WASPEC is an E-learning platform (developed by customizing MOODLE) which provides personalized learning experiences for learners based on multiple parameters. The video describes the process of personalization as a course instructor or teacher. Please fill the short questionnaire that follow. Thanks!

For further reference, please read:

[https://www.researchgate.net/publication/338634901\\_A\\_Model\\_of\\_a\\_Weighted\\_Agent\\_System\\_for\\_Personalised\\_E-Learning\\_Curriculum](https://www.researchgate.net/publication/338634901_A_Model_of_a_Weighted_Agent_System_for_Personalised_E-Learning_Curriculum)

Please be informed that your response will be used (anonymously) as part of a research study on personalized learning. Participation in this study is completely voluntary. If you decide not to participate, there will not be any negative consequences. Please be aware that if you decide to participate, you may stop requesting your response to be retrieved. By submitting this questionnaire, you agree that your data can be used in the presentation of results in this study. Thanks

Email address \*

petrachristianacademy@yahoo.com

## The Design of WASPEC

### The Design of WASPEC



Name

Ese Uzodinma

Institutional Affiliation \*

Petra Christian Academy

Position \*

- ☐ Professor/Teacher
- ☐ PhD Student/Course Instructor
- ☒ Other: Managing Director

Comments/Reviews/Recommendations

Perceived Usefulness

Using the WASPEC platform increases productivity in selecting multiple parameters for personalisation with regards to available learning resources. \*

- ☐ Strongly agree
- ☒ Agree
- ☐ Neutral
- ☐ Disagree
- ☐ Strongly Disagree

Using the WASPEC platform to create multi-parameter personalised courses in a curriculum would increase teaching performance. \*

- ☐ Strongly agree
- ☒ Agree
- ☐ Neutral
- ☐ Disagree
- ☐ Strongly Disagree

Using the WASPEC platform would increase effectiveness in creating personalised courses with multiple parameters. \*

- ☐ Strongly agree
- ☒ Agree
- ☐ Neutral
- ☐ Disagree
- ☐ Strongly Disagree

I find the WASPEC platform useful in creating personalised curriculums. \*

- ☐ Strongly agree
- ☒ Agree
- ☐ Neutral
- ☐ Disagree
- ☐ Strongly Disagree

Perceived Ease of use

Learning to work with the WASPEC platform would be easy for me. \*

- ☐ Strongly Agree
- ☒ Agree
- ☐ Neutral
- ☐ Disagree
- ☐ Strongly Disagree

I would find it easy to use the WASPEC platform to create multi-parameter personalised courses. \*

- ☐ Strongly Agree
- ☐ Agree
- ☒ Neutral
- ☐ Disagree
- ☐ Strongly Disagree

It would be easy to become skillful in the use of the WASPEC platform. \*

- ☐ Strongly Agree
- ☒ Agree
- ☐ Neutral
- ☐ Disagree
- ☐ Strongly Disagree

I would find the WASPEC platform easy and straightforward to use. \*

- ☐ Strongly Agree
- ☒ Agree
- ☐ Neutral
- ☐ Disagree
- ☐ Strongly Disagree

Perceived Intention to Use

If I had access to the WASPEC platform, I intend to adopt it. \*

- ☐ Strongly Agree
- ☒ Agree
- ☐ Neutral
- ☐ Disagree
- ☐ Strongly Disagree

I would tend to frequently use the WASPEC platform in creating personalised courses, if access is available. \*

- ☐ Strongly Agree
- ☐ Agree
- ☒ Neutral
- ☐ Disagree
- ☐ Strongly Disagree

Perceived Attitude Toward Using

Using the WASPEC platform in creating personalised learning environments has a positive influence. \*

- ☐ Strongly Agree
- ☒ Agree
- ☐ Neutral
- ☐ Disagree
- ☐ Strongly Disagree

Using the WASPEC platform is an innovative approach towards personalisation. \*

- ☐ Strongly Agree
- ☒ Agree
- ☐ Neutral
- ☐ Disagree
- ☐ Strongly Disagree

This content is neither created nor endorsed by Google.

Google Forms

# Evaluation of the WASPEC Platform

WASPEC is an E-learning platform (developed by customizing MOODLE) which provides personalized learning experiences for learners based on multiple parameters. The video describes the process of personalization as a course instructor or teacher. Please fill the short questionnaire that follow. Thanks!

For further reference, please read:

[https://www.researchgate.net/publication/338634901\\_A\\_Model\\_of\\_a\\_Weighted\\_Agent\\_System\\_for\\_Personalised\\_E-Learning\\_Curriculum](https://www.researchgate.net/publication/338634901_A_Model_of_a_Weighted_Agent_System_for_Personalised_E-Learning_Curriculum)

Please be informed that your response will be used (anonymously) as part of a research study on personalized learning. Participation in this study is completely voluntary. If you decide not to participate, there will not be any negative consequences. Please be aware that if you decide to participate, you may stop requesting your response to be retrieved. By submitting this questionnaire, you agree that your data can be used in the presentation of results in this study. Thanks

Email address \*

blissing.iyedetaire@gmail.com

## The Design of WASPEC

### The Design of WASPEC

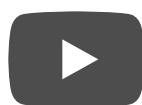

Name

Blessing iyedetaire

Institutional Affiliation \*

Petra Christian academy

Position \*

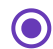

Professor/Teacher

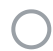

PhD Student/Course Instructor

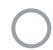

Other:

Comments/Reviews/Recommendations

Perceived Usefulness

Using the WASPEC platform increases productivity in selecting multiple parameters for personalisation with regards to available learning resources. \*

- ☐ Strongly agree
- ☒ Agree
- ☐ Neutral
- ☐ Disagree
- ☐ Strongly Disagree

Using the WASPEC platform to create multi-parameter personalised courses in a curriculum would increase teaching performance. \*

- ☐ Strongly agree
- ☒ Agree
- ☐ Neutral
- ☐ Disagree
- ☐ Strongly Disagree

Using the WASPEC platform would increase effectiveness in creating personalised courses with multiple parameters. \*

- ☐ Strongly agree
- ☒ Agree
- ☐ Neutral
- ☐ Disagree
- ☐ Strongly Disagree

I find the WASPEC platform useful in creating personalised curriculums. \*

- ☐ Strongly agree
- ☒ Agree
- ☐ Neutral
- ☐ Disagree
- ☐ Strongly Disagree

Perceived Ease of use

Learning to work with the WASPEC platform would be easy for me. \*

- ☐ Strongly Agree
- ☒ Agree
- ☐ Neutral
- ☐ Disagree
- ☐ Strongly Disagree

I would find it easy to use the WASPEC platform to create multi-parameter personalised courses. \*

- ☐ Strongly Agree
- ☒ Agree
- ☐ Neutral
- ☐ Disagree
- ☐ Strongly Disagree

It would be easy to become skillful in the use of the WASPEC platform. \*

- ☐ Strongly Agree
- ☒ Agree
- ☐ Neutral
- ☐ Disagree
- ☐ Strongly Disagree

I would find the WASPEC platform easy and straightforward to use. \*

- ☐ Strongly Agree
- ☒ Agree
- ☐ Neutral
- ☐ Disagree
- ☐ Strongly Disagree

Perceived Intention to Use

If I had access to the WASPEC platform, I intend to adopt it. \*

- ☐ Strongly Agree
- ☒ Agree
- ☐ Neutral
- ☐ Disagree
- ☐ Strongly Disagree

I would tend to frequently use the WASPEC platform in creating personalised courses, if access is available. \*

- ☐ Strongly Agree
- ☐ Agree
- ☒ Neutral
- ☐ Disagree
- ☐ Strongly Disagree

Perceived Attitude Toward Using

Using the WASPEC platform in creating personalised learning environments has a positive influence. \*

- ☐ Strongly Agree
- ☒ Agree
- ☐ Neutral
- ☐ Disagree
- ☐ Strongly Disagree

Using the WASPEC platform is an innovative approach towards personalisation. \*

- ☐ Strongly Agree
- ☒ Agree
- ☐ Neutral
- ☐ Disagree
- ☐ Strongly Disagree

This content is neither created nor endorsed by Google.

Google Forms
